# Supplementary material
Source: publisher site journal article supplement (https://www.spandidos-publications.com/8593/downloadSupplementary)
Supplement: Supplementary file 1 [file downloadSupplementary]

Table SI. Semi-quantitative MRI grading scheme.

| <b>Category and grade</b> | <b>MRI imaging features</b>                                                               |
|---------------------------|-------------------------------------------------------------------------------------------|
| Signal intensity          |                                                                                           |
| 0                         | Homogenous dark signal                                                                    |
| 1                         | Intermediate, inhomogeneous signal with focal brightness                                  |
| 2                         | Bright signal with fluid                                                                  |
| Tendon thickness          |                                                                                           |
| 0                         | Normal thickness                                                                          |
| 1                         | 100-150% normal thickness                                                                 |
| 2                         | 150-200% normal thickness                                                                 |
| Tendon retraction         |                                                                                           |
| 0                         | No retraction                                                                             |
| 1                         | Retraction to the halfway point between the footprint of the rotator cuff and the glenoid |
| 2                         | Retraction to the glenoid or further                                                      |
